# Supplementary material for: How do changes along the risk chain affect flood risk?
Source: Copernicus journal article supplement (doi:10.5194/nhess-18-3089-2018), 2018-11-19
Supplement: Supplementary file 1 [file nhess-18-3089-2018-supplement.pdf]

Supplement of Nat. Hazards Earth Syst. Sci., 18, 3089–3108, 2018  
<https://doi.org/10.5194/nhess-18-3089-2018-supplement>  
© Author(s) 2018. This work is distributed under  
the Creative Commons Attribution 4.0 License.

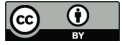

*Supplement of*

## **How do changes along the risk chain affect flood risk?**

**Ayse Duha Metin et al.**

*Correspondence to:* Ayse Duha Metin ([admetin@gfz-potsdam.com](mailto:admetin@gfz-potsdam.com))

The copyright of individual parts of the supplement might differ from the CC BY 4.0 License.

**Table S1: Simulation-based studies on the causes of flood risk changes and their relative contributions. H, E indicate whether changes in hazard or exposure are investigated. (EAD: Expected Annual Damage; EAP: Expected Annual Population exposed).**

| Study                            | Time frame, region               | Drivers considered |                     |                   |                          |                            |                        | Risk indicators | Results  |                                                                                                                                                                                                                                                                                                                                                                                                 |
|----------------------------------|----------------------------------|--------------------|---------------------|-------------------|--------------------------|----------------------------|------------------------|-----------------|----------|-------------------------------------------------------------------------------------------------------------------------------------------------------------------------------------------------------------------------------------------------------------------------------------------------------------------------------------------------------------------------------------------------|
|                                  |                                  | Climate change (H) | Land subsidence (H) | Change in GDP (E) | Change in population (E) | Change in asset values (E) | Change in land use (E) |                 |          | Change in cropland area (E)                                                                                                                                                                                                                                                                                                                                                                     |
| <b>Alfieri et al. (2015)</b>     | 1990-2080, Europe (28 countries) | ✓                  |                     | ✓                 | ✓                        |                            |                        |                 | EAD, EAP | <ul style="list-style-type: none"> <li>▪ Risk increases by an average of 220%, due to climate change only.</li> <li>▪ When socio-economic development pathways are included, current mean estimates of € 5.3 B of EAD increase to 20-40 B€ in 2050, 30-100 B€ in 2080 and current mean value of 216,000 EAP range between 500,000-640,000 in 2050, 540,000-950,000 in 2080.</li> </ul>          |
| <b>Arnell and Gosling (2016)</b> | 2050, global (20 regions)        | ✓                  |                     | ✓                 | ✓                        | ✓                          |                        | ✓               | EAD, EAP | <ul style="list-style-type: none"> <li>▪ Climate change has the potential to considerably change human exposure to flood, but for different climate scenarios this impact is highly uncertain.</li> <li>▪ The ranges of risk indicators for different climate models are substantially higher than the ranges for emission and socio-economic scenarios under a given climate model.</li> </ul> |

|                               |                                 |   |   |  |  |   |   |  |                              |                                                                                                                                                                                                                                                                                                                                                                                                                                                                                                                               |
|-------------------------------|---------------------------------|---|---|--|--|---|---|--|------------------------------|-------------------------------------------------------------------------------------------------------------------------------------------------------------------------------------------------------------------------------------------------------------------------------------------------------------------------------------------------------------------------------------------------------------------------------------------------------------------------------------------------------------------------------|
| <b>Bouwer et al. (2010)</b>   | 2040, south Netherlands         | ✓ |   |  |  | ✓ | ✓ |  | EAD, Loss probability curves | <ul style="list-style-type: none"> <li>▪ Increase in expected damage due to change in asset values and land use is between 35-172 % while climate change causes 46-201 % increase in damage by 2040.</li> <li>▪ For different land use categories, losses remain largely unchanged.</li> <li>▪ Impact of change in assets are quite significant, they may double damage values.</li> </ul>                                                                                                                                    |
| <b>Budiyono et al. (2016)</b> | 2030, Jakarta                   | ✓ | ✓ |  |  |   | ✓ |  | EAD                          | <ul style="list-style-type: none"> <li>▪ As a result of combinations of all future scenarios, median increase of 180 % by 2030.</li> <li>▪ Land subsidence as a single driver has the largest contribution which increases risk by 126%.</li> <li>▪ No clear signal is found on the effect of climate change on the flood risk. Climate change results found highly uncertain.</li> <li>▪ If land use changes with a same rate as the last 30 years, change in land use leads to large increase in the flood risk.</li> </ul> |
| <b>Elmer et al. (2012)</b>    | 1990-2020, Mulde River, Germany | ✓ |   |  |  | ✓ | ✓ |  | EAD                          | <ul style="list-style-type: none"> <li>▪ Climate change impact is important but not dominant.</li> <li>▪ The expansion of residential areas (land use change) is the main driver of flood risk.</li> </ul>                                                                                                                                                                                                                                                                                                                    |
| <b>Feyen et al. (2009)</b>    | 2071-2100, Europe               | ✓ |   |  |  |   | ✓ |  | EAD                          | <ul style="list-style-type: none"> <li>▪ Both climate change and land use change have significant effects on future flood risk increase.</li> <li>▪ Increase in exposure due to urbanization outweighs effects of climate change.</li> </ul>                                                                                                                                                                                                                                                                                  |
| <b>Feyen et al. (2012)</b>    | 2071-2100, Europe               | ✓ |   |  |  |   |   |  | EAD, EAP                     | <ul style="list-style-type: none"> <li>▪ Flood damages are anticipated to rise across Western Europe and to decrease across north-eastern parts of Europe.</li> </ul>                                                                                                                                                                                                                                                                                                                                                         |

|                                 |                                 |   |  |   |   |   |   |  |                                                                                                                                                                                                   |                                                                                                                                                                                                                                                                                                                                                                                                                                                                                       |
|---------------------------------|---------------------------------|---|--|---|---|---|---|--|---------------------------------------------------------------------------------------------------------------------------------------------------------------------------------------------------|---------------------------------------------------------------------------------------------------------------------------------------------------------------------------------------------------------------------------------------------------------------------------------------------------------------------------------------------------------------------------------------------------------------------------------------------------------------------------------------|
|                                 |                                 |   |  |   |   |   |   |  |                                                                                                                                                                                                   | <ul style="list-style-type: none"> <li>▪ Current annual damage of € 6.4 billion and 250,000 people exposed are projected to € 14-21.5 billion annual damage and 400,000 people exposed by the end of the century due to climate change.</li> </ul>                                                                                                                                                                                                                                    |
| <b>Hall et al. (2003)</b>       | 2030-2100, England and Wales    | ✓ |  | ✓ | ✓ | ✓ | ✓ |  | EAD, EAP                                                                                                                                                                                          | <ul style="list-style-type: none"> <li>▪ Socio-economic drivers have more influence on increasing flood risk than by climate change.</li> <li>▪ Scenario with combination of highest economic growth and increasing flood frequency can cause up to 20 fold increase in risk.</li> <li>▪ Change in asset values has higher impact on flood risk.</li> <li>▪ Scenario with great change in climate can double number of people at risk.</li> </ul>                                     |
| <b>Hattermann et al. (2014)</b> | 2011-2100, Germany              | ✓ |  |   |   |   |   |  | EAD                                                                                                                                                                                               | <ul style="list-style-type: none"> <li>▪ Due to climate change, flood losses considerably increase.</li> <li>▪ On average, total annual damage increases from €465 million to €993 million by the end of century.</li> </ul>                                                                                                                                                                                                                                                          |
| <b>Lung et al. (2013)</b>       | 2011-2040 and 2041-2070, Europe | ✓ |  |   |   | ✓ | ✓ |  | 3 impact indicators related to 100-year flood: percentage of flooded area; mean water depth of flooded area; percentage of commercial & industrial areas within flooded area (only for 2011-2040) | <ul style="list-style-type: none"> <li>▪ To identify potential impacts of flood, combination scenarios of climatic and non-climatic drivers found to be crucial.</li> <li>▪ Throughout Europe, there are slight increase in flood risk due to climate change mainly.</li> <li>▪ The interactions between human settlements and hydro-geographical settings of the regions may increase flood risk. For example catchments with major river systems have higher flood risk.</li> </ul> |

|                               |                           |   |  |   |   |   |   |  |          |                                                                                                                                                                                                                                                                                                                                                                                                                                                                                |
|-------------------------------|---------------------------|---|--|---|---|---|---|--|----------|--------------------------------------------------------------------------------------------------------------------------------------------------------------------------------------------------------------------------------------------------------------------------------------------------------------------------------------------------------------------------------------------------------------------------------------------------------------------------------|
| <b>Muis et al. (2015)</b>     | 2000-2030, Indonesia      | ✓ |  |   |   |   | ✓ |  | EAD      | <ul style="list-style-type: none"> <li>▪ Climate change was found as highly uncertain on flood risk.</li> <li>▪ Land use change (urban expansion) is the main driver of flood risk.</li> <li>▪ This has been emphasized that increase in exposure will result in 76 % increase in flood risk, on average.</li> </ul>                                                                                                                                                           |
| <b>Rojas et al. (2013)</b>    | 2000-2080, European Union | ✓ |  | ✓ | ✓ | ✓ |   |  | EAD, EAP | <ul style="list-style-type: none"> <li>▪ Depending on the combined effect of climate change and socio-economic changes, there are significant increase in future damages and number of people affected by floods.</li> <li>▪ By the combination of all drivers, number of people affected increases from 200,000 up to 360,000.</li> <li>▪ The largest share of damages are due to change in asset values, GDP and population projections (socio-economic changes).</li> </ul> |
| <b>Te Linde et al. (2011)</b> | 2030, Rhine catchment     | ✓ |  |   |   |   | ✓ |  | EAD      | <ul style="list-style-type: none"> <li>▪ Increase in EAD ranging from 54% to 230% in 2030 compared to 2000, depending on climate change and land-use scenarios.</li> <li>▪ Approx. 75 % of increase attributed to climate change.</li> </ul>                                                                                                                                                                                                                                   |
